# Supplementary material for: Boltzmann-type cryogenic ratiometric thermometry based on Nd3+-doped LuVO4 phosphors
Source: Royal Society of Chemistry journal article supplement (doi:10.1039/d3tc02043f), 2023-01-01
Supplement: d3tc02043f1.pdf [file d3tc02043f1.pdf]

## Supplementary material

### **Boltzmann-type cryogenic ratiometric thermometry based on Nd<sup>3+</sup>-doped LuVO<sub>4</sub> phosphors**

Alexey A. Kalinichev<sup>1</sup>, Elena V. Afanaseva<sup>2</sup>, Evgenii Yu. Kolesnikov<sup>2</sup>, Ilya E. Kolesnikov<sup>1,\*</sup>

<sup>1</sup> St. Petersburg University, Universitetskaya nab. 7-9, 199034, St. Petersburg, Russia

<sup>2</sup> Peter the Great St. Petersburg Polytechnic University, Polytechnicheskaya 29, 195251, St. Petersburg, Russia

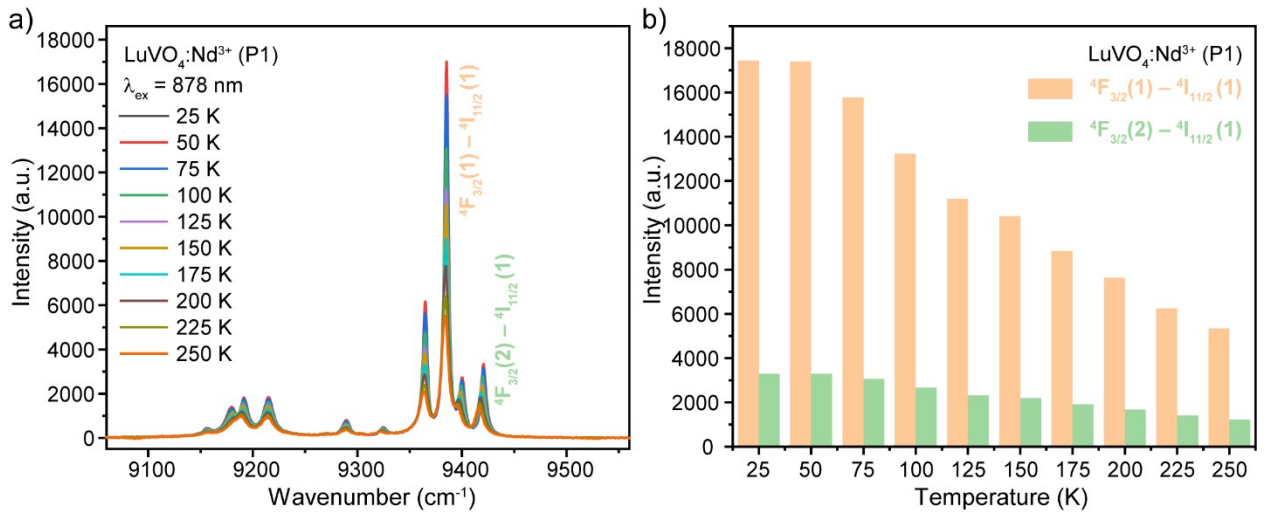

Figure S1. a) Emission spectra of LuVO<sub>4</sub>:Nd<sup>3+</sup> 1 at.% sample (P1) at different temperatures ( $\lambda_{\text{ex}} = 878$  nm), b) temperature dependence of the peak emission intensities of  ${}^4F_{3/2}(2) - {}^4I_{11/2}(1)$  and  ${}^4F_{3/2}(1) - {}^4I_{11/2}(1)$  transitions.

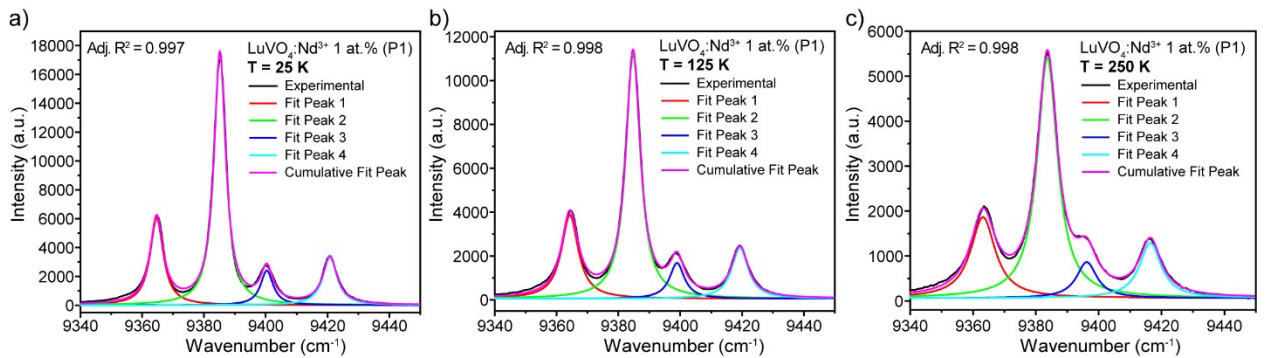

Figure S2. Deconvolution of emission spectra ( $\lambda_{\text{ex}} = 878$  nm) of LuVO<sub>4</sub>:Nd<sup>3+</sup> 1 at.% sample (P1) at different temperatures: a) 25 K; b) 125 K; c) 250 K.

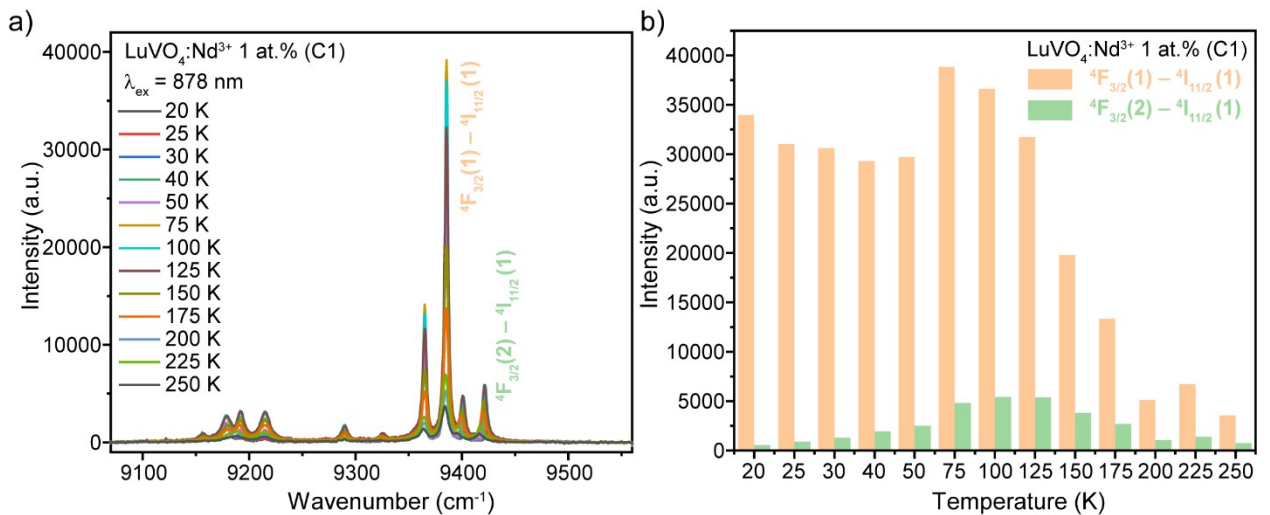

Figure S3. a) Emission spectra of LuVO<sub>4</sub>:Nd<sup>3+</sup> 1 at.% sample (C1) at different temperatures ( $\lambda_{\text{ex}} = 878$  nm), b) temperature dependence of the peak emission intensities of  ${}^4F_{3/2}(2) - {}^4I_{11/2}(1)$  and  ${}^4F_{3/2}(1) - {}^4I_{11/2}(1)$  transitions.

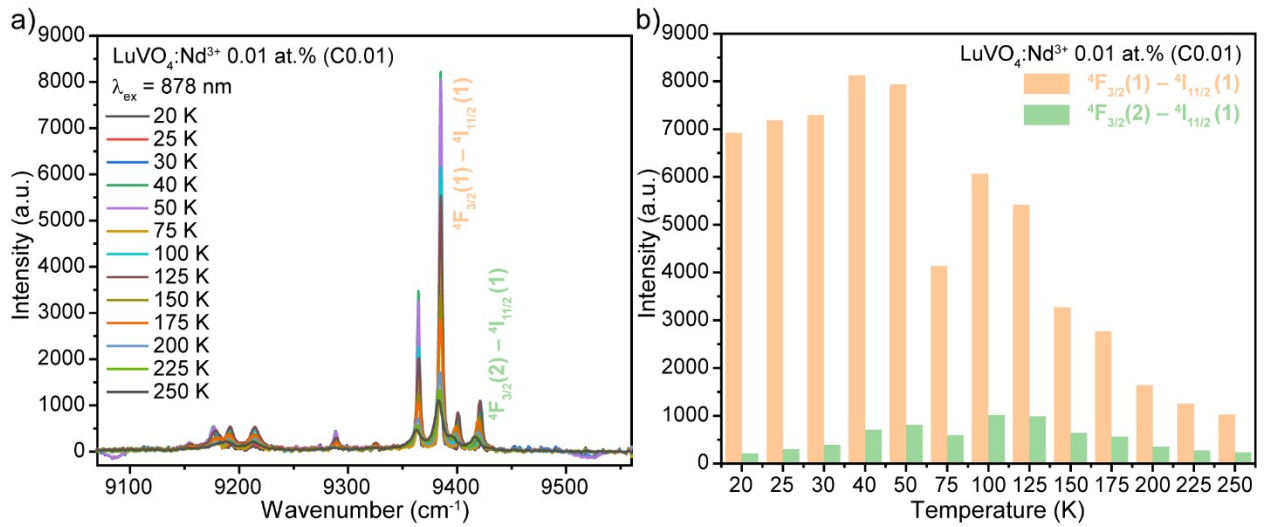

Figure S4. a) Emission spectra of LuVO<sub>4</sub>:Nd<sup>3+</sup> 0.01 at.% sample (C0.01) at different temperatures ( $\lambda_{ex} = 878$  nm), b) temperature dependence of the peak emission intensities of  ${}^4F_{3/2}(2) - {}^4I_{11/2}(1)$  and  ${}^4F_{3/2}(1) - {}^4I_{11/2}(1)$  transitions.

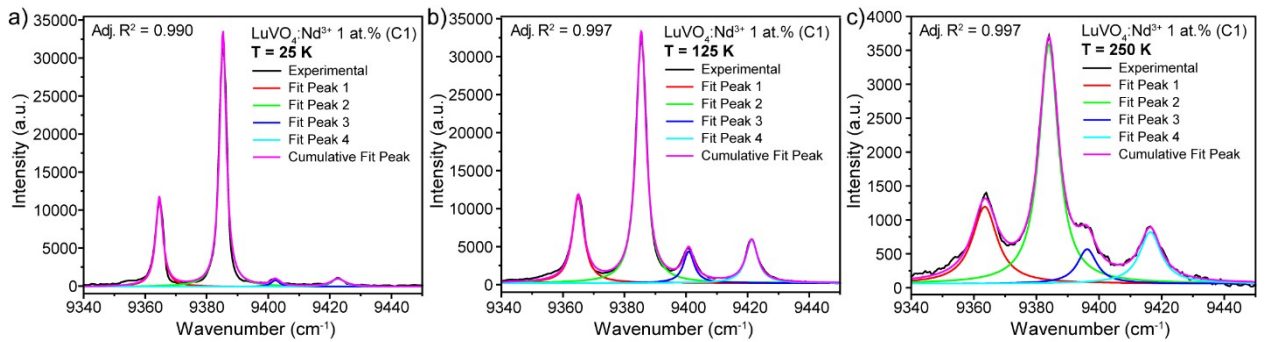

Figure S5. Deconvolution of emission spectra ( $\lambda_{ex} = 878$  nm) of LuVO<sub>4</sub>:Nd<sup>3+</sup> 1 at.% sample (C1) at different temperatures: a) 25 K; b) 125 K; c) 250 K.

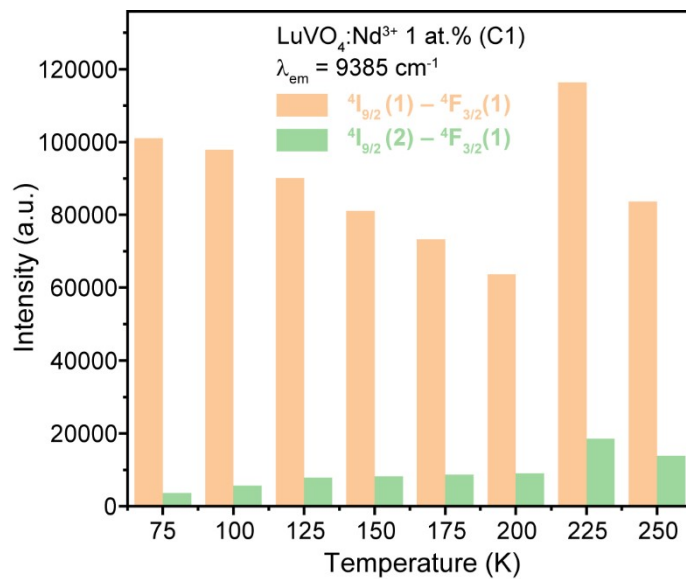

Figure S6. Temperature dependence of the peak emission intensities of  ${}^4I_{9/2}(1) - {}^4F_{3/2}(1)$  and  ${}^4I_{9/2}(2) - {}^4F_{3/2}(1)$  transitions.
